# Supplementary material for: Comparative Performance of Linear Regression and Machine Learning Models for Predicting Glycemic Status in Uncontrolled Type 2 Diabetes: SHAP-Based Analysis
Source: Research Square preprint supplement (doi:10.21203/rs.3.rs-7292468/v1), 2025-09-11

99+

Mail

Chat

Meet

Compose

Inbox

11,623

Starred

Snoozed

Sent

Drafts

More

Labels

\_Outbox

Conversation Action Sett...

Root Folder

donald.morisky@

Active

?

My current MMSA-8 license

External

Inbox x

1 of 3

J

Juhaina Al maqbali

Sun, May 4, 10:51 AM

Dear Donlad Morisky Hope this email finds you well, I was licensed to use the MMSA-8 f...

D

Marty Morisky

Sun, May 4, 6:20 PM

Juhaina, using a subset of a larger dataset to report on characteristics or trends—without...

J

Juhaina Al maqbali

Sun, May 4, 6:31 PM

What do you think prof mohammed !

J

Juhaina Al maqbali

Mon, May 5, 11:57 AM

Thank you for the clarification I will send you the manuscript once finalized in oder to che...

J

Juhaina Al maqbali

Tue, Jun 24, 11:01 AM

Dear Marty Morisky, Following up on our previous conversation, I would appreciate it if yo...

J

Juhaina Al maqbali

Tue, Jul 1, 9:09 AM

A gentle reminder !!

D

Marty Morisky

Tue, Jul 1, 4:02 PM

Dear Juhaina, a retroactive license is needed since you have already collected the data. ...

J

Juhaina Al maqbali

Wed, Jul 2, 11:26 AM

----- Forwarded message ----- From: Marty Morisky <marty.morisky@moriskyscale....

J

Juhaina Al maqbali

Wed, Jul 2, 5:48 PM

Dear Marty, I hope this message finds you well. We are writing to confirm that we remain ...

D

Marty Morisky

Wed, Jul 2, 11:43 PM

to me, Donald, Philip

Juhaina, Thank you for your update regarding the secondary manuscript utilizing a subset of participants from the originally licensed dataset under Certificate Number: 1350. I can confirm that since this data is a subset of the original dataset, a new license is not required. The only requirement is to ensure that the scoring algorithm for the MMSA-8 tool is not divulged in the manuscript or any related materials.

We appreciate your diligence in maintaining compliance with the inclusion of appropriate citations and the required intellectual property legend. Thank you for submitting the necessary documentation as advised.

Please let me know if you need further clarification or assistance as you proceed with the manuscript.

Best regards,

Marty

Sent from my iPhone

On Jul 2, 2025, at 6:48 AM, Juhaina Al maqbali <juhaina@squ.edu.om> wrote

more...

...

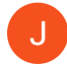

**Juhaina Al maqbali** <juhaina@squ.edu.om>

Wed, Jul 2, 11:49 PM

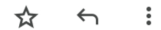

to Marty, Donald, Philip ▾

That is great news.

I confirm that the scoring algorithm for the MMSA-8 tool is not divulged in the manuscript or any related materials.

We can now proceed with our submission plan.

Much appreciated

...

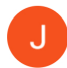

**Juhaina Al maqbali** <juhaina@squ.edu.om>

Thu, Jul 3, 10:05 AM

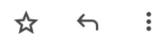

to Mohammed ▾

Salam Prof. Mohammed

Great that we were able to waive the payment to Morisky and a retroactive license is no longer needed.

Now we can proceed with publication safely. We need not to forget to mention Certificate Number: 1350 in both manuscripts.

Thank you

Juhaina

...

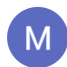

**Mohammed Alzaabi**

Sun, Jul 6, 8:22 PM

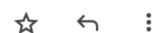

to me ▾

Walikum Asalam Juhina

Good news.

I have not heard from Iman regarding the manuscript yet.

Hopefully it is ready before the end of this month for collaborator review and submission Inshallah.

Regards,

...

--

Mohammed Al Za'abi MD, PhD.

Professor & Head of Department of Pharmacology & Clinical Pharmacy

College of Medicine and Health Sciences

Sultan Qaboos University, Muscat, Oman

Tel: 24143596

Email: [zaabi@squ.edu.om](mailto:zaabi@squ.edu.om)

That's great news!

Thanks for the update.

I hope so too.

↩ Reply

➦ Forward

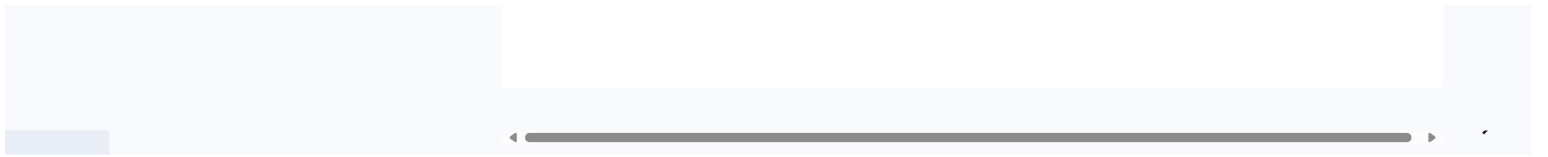

Supplement: Supplementary file 2 [file eb57b21130e77ec759c33c3c.pdf]
