# Supplementary material for: Comparative Performance of Linear Regression and Machine Learning Models for Predicting Glycemic Status in Uncontrolled Type 2 Diabetes: SHAP-Based Analysis
Source: Research Square preprint supplement (doi:10.21203/rs.3.rs-7292468/v1), 2025-09-11

Certificate Number: 1350

**To Whom It May Concern:**

This is to inform you that Juhaina Salim Mohamed Al Maqbali from Sultan Qaboos University has my permission to use the MMAS-8 (Morisky Medication Adherence Scale 8 item), Arabiv translation, in this research study:

" The Effect of Oral Magnesium Supplements on The Control and Outcomes of Type 2 Diabetes Mellitus Guided by Serum Ionized Magnesium Concentration: A Double-Blind Randomized Control Trial."

The requirements to use this scale are to cite the following references in the document:

1. Berlowitz DR, Foy CG, Kazis LE, Bolin L, Lonroy LB, Fitzpatrick P, et al. for the SPRINT Study Research Group. Impact of Intensive Blood Pressure Therapy on Patient-Reported Outcomes: Outcomes Results from the SPRINT Study. N Engl J Med 2017; 377:733-44.
2. Bress AP, Bellows BK, King J, Hess R, Beddhu S, Zhang Z, et al, for the SPRINT Research Group and the SPRINT Economics and Health Related Quality of Life Subcommittee. Cost-Effectiveness of Intensive versus Standard Blood Pressure Control. N Engl J Med 2017; 377:745-55.

- i. The following footnote is required in all articles, presentations, web postings, reports and submitted manuscripts, and on the first table or figure which present the MMAS-8 as well as in the Acknowledgment Section of manuscripts submitted for publication:

**The MMAS-8 Scale, content, name, and trademarks are protected by US copyright and trademark laws. Permission for use of the scale and its coding is required. A license agreement is available from MMAR, LLC., [www.moriskyscale.com](http://www.moriskyscale.com).**

- ii. The MORISKY SCALE intellectual property legend must appear on the first page of all (Morisky) Questionnaires: (© 2007 Donald E. Morisky)



Donald E. Morisky, Sc.D., M.S.P.H., Sc.M. President  
Morisky Medication Adherence Research, LLC

[www.moriskyscale.com](http://www.moriskyscale.com)

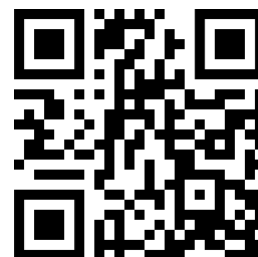

Supplement: Supplementary file 1 [file 51f58c22076840a7d135f056.pdf]
